# Supplementary material
Source: publisher site journal article supplement (https://www.dovepress.com/article/412821)
Supplement: Supplementary file 1 [file get_supplementary_file.php]

## Supplementary Figure 1: Questionnaire

### Part A: Socio-Demographic Characteristics

|                                                    |                                                                                                                                    |
|----------------------------------------------------|------------------------------------------------------------------------------------------------------------------------------------|
| 1. Name                                            |                                                                                                                                    |
| 2. Age (In completed Years)                        |                                                                                                                                    |
| 3. Address                                         | Province                                                                                                                           |
| 4. Place of residence                              | 1. Home<br>2. Shelter<br>3. Homeless                                                                                               |
| 5. Gender                                          | 1. Male<br>2. Female                                                                                                               |
| 6. Education                                       | 1. No formal education<br>2. Primary/Basic<br>3. Secondary<br>4. Baccalaureate<br>5. Higher Education<br>6. Professional/Religious |
| 7. Previous occupation                             | 1. Government<br>2. Private<br>3. Both<br>4. Self-employed<br>5. Housewife<br>6. Unemployed                                        |
| 8. Marital Status                                  | 1. Single<br>2. Married<br>3. Divorced<br>4. Widow                                                                                 |
| 9. Family contact in the past month                | 1. No contact<br>2. Daily<br>3. Less than daily                                                                                    |
| 10. Lived outside Afghanistan in the past 10 years | 1. Yes<br>2. No                                                                                                                    |
| 11. Housing situations                             | 1. Owned<br>2. Rented<br>3. Tents<br>4. Without permanent residence                                                                |

## Part B: Addiction and medical history

|                                                 |                                                                                                                                                                                                                                                                        |
|-------------------------------------------------|------------------------------------------------------------------------------------------------------------------------------------------------------------------------------------------------------------------------------------------------------------------------|
| 12. At what age, you used drugs for first time? |                                                                                                                                                                                                                                                                        |
| 13. What is the drug you used for first time?   | <ol style="list-style-type: none"> <li>1. Hashish</li> <li>2. Opium</li> <li>3. Heroin</li> <li>4. Others ( )</li> </ol>                                                                                                                                               |
| 14. What drugs were you currently using?        | <ol style="list-style-type: none"> <li>1. Hashish</li> <li>2. Opium</li> <li>3. Heroin</li> <li>4. Others ( )</li> </ol>                                                                                                                                               |
| 15. How often did you use the drugs?            | <ol style="list-style-type: none"> <li>1. Once a day</li> <li>2. Once a week</li> <li>3. More than once a day</li> <li>4. Several times a week</li> </ol>                                                                                                              |
| 16. How did you use the drug?                   | <ol style="list-style-type: none"> <li>1. Sniff (via nose)</li> <li>2. Smoke (like cigarette)</li> <li>3. Oral</li> <li>4. Injection</li> </ol>                                                                                                                        |
| 17. Reasons for starting the drugs              | <ol style="list-style-type: none"> <li>1. Family disputes</li> <li>2. Joy seeking</li> <li>3. Friends offer</li> <li>4. Psychiatric disorders</li> <li>5. Presence of an addicted person in the family</li> <li>6. Economic problems</li> <li>7. Others ( )</li> </ol> |
| 18. Presence of addicted person in the family?  | <ol style="list-style-type: none"> <li>1. Yes</li> <li>2. No</li> </ol>                                                                                                                                                                                                |
| 19. Attempt to quit in the past?                | <ol style="list-style-type: none"> <li>1. Yes</li> <li>2. No (If no go to Q21)</li> </ol>                                                                                                                                                                              |
| 20. Reasons for failure?                        | <ol style="list-style-type: none"> <li>1. Lack of social support</li> <li>2. Physical/Medical problems</li> <li>3. Peer pressure</li> <li>4. Economic problems</li> <li>5. Access and availability of drugs in the area</li> <li>6. Others ( )</li> </ol>              |
| 21. Treatment facility                          | <ol style="list-style-type: none"> <li>1. Public</li> <li>2. Private</li> </ol>                                                                                                                                                                                        |
| 22. Brought to health facilities                | <ol style="list-style-type: none"> <li>1. Family/Peers</li> <li>2. Self-intent</li> <li>3. Government</li> <li>4. Referred by Doctor</li> <li>5. Others ( )</li> </ol>                                                                                                 |

|                             |                 |
|-----------------------------|-----------------|
| 23. History of crime        | 1. Yes<br>2. No |
| 24. History of imprisonment | 1. Yes<br>2. No |

|                                                       |                                                     |
|-------------------------------------------------------|-----------------------------------------------------|
| 25. How do you rate your general health?              | 1. Very good<br>2. Fair<br>3. Poor<br>4. Don't know |
| 26. Physical illnesses or injury in the past 30 days? | 1. Yes<br>2. No                                     |
| 27. Hospitalized in the past 30 days?                 | 1. Yes<br>2. No                                     |
| 28. Ever hospitalized?                                | 1. Yes<br>2. No                                     |
| 29. Any chronic diseases                              | 1. Yes<br>2. No                                     |
| 30. If yes what?                                      |                                                     |

### Part C: Functional Social Support

| NO | I get symptoms                                                           | NOT AT ALL | A LITTLE | QUITE A BIT | EXTREMELY |
|----|--------------------------------------------------------------------------|------------|----------|-------------|-----------|
| 1  | People who care what happens to me                                       |            |          |             |           |
| 2  | Love and affection                                                       |            |          |             |           |
| 3  | Chances to talk to someone I trust about my personal and family problems |            |          |             |           |
| 4  | Useful advice about important things in life                             |            |          |             |           |
| 5  | Assistance with transportation                                           |            |          |             |           |

## Part D: Depression, Anxiety and Stress Scale (DASS-21)

| NO       |                                                                                                                                     | NOT AT   | A LITTLE | QUITE A BIT | EXTREMELY |
|----------|-------------------------------------------------------------------------------------------------------------------------------------|----------|----------|-------------|-----------|
| <b>A</b> | <b>Anxiety Sub-Scale</b>                                                                                                            | <b>0</b> | <b>1</b> | <b>2</b>    | <b>3</b>  |
| 1        | I was aware of dryness of Mouth                                                                                                     |          |          |             |           |
| 2        | I experienced breathing difficulty (e.g, excessively rapid breathing, breathlessness in the absence of physical exertion)           |          |          |             |           |
| 3        | I experienced trembling (e.g, in Hands)                                                                                             |          |          |             |           |
| 4        | I was worried about situations in which I might panic and make a fool of myself                                                     |          |          |             |           |
| 5        | I felt I was close to Panic                                                                                                         |          |          |             |           |
| 6        | I felt scared without any good reason                                                                                               |          |          |             |           |
| 7        | I was aware of the action of my heart in the absence of physical exertion (e.g, Sense of heart rate increase, heart missing a beat) |          |          |             |           |
| <b>B</b> | <b>Depression Sub-Scale</b>                                                                                                         | <b>0</b> | <b>1</b> | <b>2</b>    | <b>3</b>  |
| 8        | I couldn't seem to experience any positive feeling at all                                                                           |          |          |             |           |
| 9        | I found it difficult to work up the initiative to do things                                                                         |          |          |             |           |
| 10       | I felt that I had nothing to look forward to                                                                                        |          |          |             |           |
| 11       | I felt down-hearted and blue                                                                                                        |          |          |             |           |
| 12       | I was unable to become enthusiastic about anything                                                                                  |          |          |             |           |
| 13       | I felt I wasn't worth much as a person                                                                                              |          |          |             |           |
| 14       | I felt that life was meaningless                                                                                                    |          |          |             |           |
| <b>B</b> | <b>Stress Sub-Scale</b>                                                                                                             | <b>0</b> | <b>1</b> | <b>2</b>    | <b>3</b>  |
| 15       | I found it hard to wind down                                                                                                        |          |          |             |           |
| 16       | I tended to over react to situations                                                                                                |          |          |             |           |
| 17       | I felt that I was using a lot of nervous energy                                                                                     |          |          |             |           |
| 18       | I found myself getting agitated                                                                                                     |          |          |             |           |
| 19       | I found it difficult to relax                                                                                                       |          |          |             |           |
| 20       | I was intolerant of anything that kept me from getting on with what I was doing                                                     |          |          |             |           |
| 21       | I felt that I was rather touchy                                                                                                     |          |          |             |           |
